# Supplementary material
Source: publisher figshare collection journal article supplement (https://gsajournals.figshare.com/ndownloader/files/14675423)
Supplement: Supplementary file 1 [file 14675423]

## Sheet: #1
frame	time	PC	TB	ant isth	mid isth	post isth
1	00:00:00
2	00:00:00.036000
3	00:00:00.074000
4	00:00:00.113000
5	00:00:00.149000
6	00:00:00.188000
7	00:00:00.228000
8	00:00:00.267000
9	00:00:00.307000
10	00:00:00.346000
11	00:00:00.386000
12	00:00:00.425000
13	00:00:00.465000
14	00:00:00.504000
15	00:00:00.544000
16	00:00:00.583000
17	00:00:00.623000
18	00:00:00.662000
19	00:00:00.702000
20	00:00:00.741000
21	00:00:00.781000
22	00:00:00.820000
23	00:00:00.860000
24	00:00:00.899000
25	00:00:00.939000
26	00:00:00.978000
27	00:00:01.018000
28	00:00:01.058000
29	00:00:01.097000
30	00:00:01.136000
31	00:00:01.176000
32	00:00:01.215000
33	00:00:01.255000
34	00:00:01.294000
35	00:00:01.334000
36	00:00:01.374000
37	00:00:01.413000
38	00:00:01.453000
39	00:00:01.492000
40	00:00:01.532000
41	00:00:01.571000
42	00:00:01.611000
43	00:00:01.650000
44	00:00:01.690000
45	00:00:01.729000
46	00:00:01.769000
47	00:00:01.808000
48	00:00:01.848000
49	00:00:01.887000
50	00:00:01.927000
51	00:00:01.966000
52	00:00:02.006000
53	00:00:02.045000
54	00:00:02.085000
55	00:00:02.124000
56	00:00:02.164000
57	00:00:02.203000
58	00:00:02.243000
59	00:00:02.282000
60	00:00:02.322000
61	00:00:02.361000
62	00:00:02.401000
63	00:00:02.440000
64	00:00:02.480000
65	00:00:02.519000
66	00:00:02.559000
67	00:00:02.598000
68	00:00:02.638000
69	00:00:02.677000
70	00:00:02.717000
71	00:00:02.756000
72	00:00:02.796000
73	00:00:02.835000
74	00:00:02.875000
75	00:00:02.915000
76	00:00:02.954000
77	00:00:02.994000
78	00:00:03.033000
79	00:00:03.073000
80	00:00:03.112000
81	00:00:03.152000
82	00:00:03.191000
83	00:00:03.231000
84	00:00:03.270000
85	00:00:03.310000
86	00:00:03.349000
87	00:00:03.389000
88	00:00:03.428000
89	00:00:03.468000
90	00:00:03.507000
91	00:00:03.547000
92	00:00:03.586000
93	00:00:03.626000
94	00:00:03.665000
95	00:00:03.705000
96	00:00:03.744000
97	00:00:03.784000
98	00:00:03.823000
99	00:00:03.863000
100	00:00:03.902000
101	00:00:03.942000
102	00:00:03.981000
103	00:00:04.021000
104	00:00:04.060000
105	00:00:04.100000
106	00:00:04.139000
107	00:00:04.179000
108	00:00:04.218000
109	00:00:04.258000
110	00:00:04.297000
111	00:00:04.337000
112	00:00:04.377000
113	00:00:04.416000
114	00:00:04.456000
115	00:00:04.495000
116	00:00:04.535000
117	00:00:04.574000
118	00:00:04.614000
119	00:00:04.653000
120	00:00:04.693000
121	00:00:04.732000
122	00:00:04.772000
123	00:00:04.811000
124	00:00:04.851000
125	00:00:04.890000
126	00:00:04.930000
127	00:00:04.969000
128	00:00:05.008000
129	00:00:05.047000
130	00:00:05.087000
131	00:00:05.126000
132	00:00:05.166000
133	00:00:05.205000
134	00:00:05.245000
135	00:00:05.284000
136	00:00:05.324000
137	00:00:05.363000
138	00:00:05.403000
139	00:00:05.442000
140	00:00:05.482000
141	00:00:05.521000
142	00:00:05.561000
143	00:00:05.600000
144	00:00:05.640000
145	00:00:05.679000
146	00:00:05.719000
147	00:00:05.758000
148	00:00:05.798000
149	00:00:05.837000
150	00:00:05.877000
151	00:00:05.917000
152	00:00:05.956000
153	00:00:05.995000
154	00:00:06.035000
155	00:00:06.074000
156	00:00:06.114000
157	00:00:06.153000
158	00:00:06.193000
159	00:00:06.233000
160	00:00:06.272000
161	00:00:06.312000
162	00:00:06.351000
163	00:00:06.391000
164	00:00:06.430000
165	00:00:06.470000
166	00:00:06.509000
167	00:00:06.549000
168	00:00:06.588000
169	00:00:06.628000
170	00:00:06.667000
171	00:00:06.707000
172	00:00:06.746000
173	00:00:06.786000
174	00:00:06.825000
175	00:00:06.865000
176	00:00:06.904000
177	00:00:06.944000
178	00:00:06.983000
179	00:00:07.023000
180	00:00:07.062000
181	00:00:07.102000
182	00:00:07.141000
183	00:00:07.181000
184	00:00:07.220000
185	00:00:07.260000
186	00:00:07.299000
187	00:00:07.339000
188	00:00:07.378000
189	00:00:07.418000
190	00:00:07.457000
191	00:00:07.497000
192	00:00:07.536000
193	00:00:07.576000
194	00:00:07.615000
195	00:00:07.655000
196	00:00:07.695000
197	00:00:07.734000
198	00:00:07.774000
199	00:00:07.813000
200	00:00:07.853000
201	00:00:07.892000
202	00:00:07.932000
203	00:00:07.971000
204	00:00:08.011000
205	00:00:08.050000
206	00:00:08.090000
207	00:00:08.129000
208	00:00:08.169000
209	00:00:08.208000
210	00:00:08.248000
211	00:00:08.287000
212	00:00:08.327000
213	00:00:08.366000
214	00:00:08.406000
215	00:00:08.445000
216	00:00:08.485000
217	00:00:08.524000
218	00:00:08.564000
219	00:00:08.603000
220	00:00:08.643000
221	00:00:08.682000
222	00:00:08.722000
223	00:00:08.761000
224	00:00:08.801000
225	00:00:08.840000
226	00:00:08.880000
227	00:00:08.919000
228	00:00:08.959000
229	00:00:08.998000
230	00:00:09.038000
231	00:00:09.077000
232	00:00:09.117000
233	00:00:09.156000
234	00:00:09.196000
235	00:00:09.236000
236	00:00:09.275000
237	00:00:09.315000
238	00:00:09.354000
239	00:00:09.394000
240	00:00:09.433000
241	00:00:09.473000
242	00:00:09.512000
243	00:00:09.552000
244	00:00:09.591000
245	00:00:09.631000
246	00:00:09.670000
247	00:00:09.710000
248	00:00:09.749000
249	00:00:09.789000
250	00:00:09.828000
251	00:00:09.868000
252	00:00:09.907000
253	00:00:09.947000
254	00:00:09.986000
255	00:00:10.026000
256	00:00:10.065000
257	00:00:10.105000
258	00:00:10.144000
259	00:00:10.184000
260	00:00:10.223000
261	00:00:10.263000
262	00:00:10.302000
263	00:00:10.342000
264	00:00:10.381000
265	00:00:10.421000
266	00:00:10.460000
267	00:00:10.500000
268	00:00:10.539000
269	00:00:10.579000
270	00:00:10.618000
271	00:00:10.658000
272	00:00:10.697000
273	00:00:10.737000
274	00:00:10.777000
275	00:00:10.816000
276	00:00:10.855000
277	00:00:10.895000
278	00:00:10.934000
279	00:00:10.974000
280	00:00:11.013000
281	00:00:11.053000
282	00:00:11.093000
283	00:00:11.132000
284	00:00:11.172000
285	00:00:11.211000
286	00:00:11.251000
287	00:00:11.290000
288	00:00:11.330000
289	00:00:11.369000
290	00:00:11.409000
291	00:00:11.448000
292	00:00:11.488000
293	00:00:11.527000
294	00:00:11.567000
295	00:00:11.606000
296	00:00:11.646000
297	00:00:11.685000
298	00:00:11.725000
299	00:00:11.764000
300	00:00:11.804000
301	00:00:11.843000
302	00:00:11.883000
303	00:00:11.922000
304	00:00:11.962000
305	00:00:12.001000
306	00:00:12.041000
307	00:00:12.080000
308	00:00:12.120000
309	00:00:12.159000
310	00:00:12.199000
311	00:00:12.238000
312	00:00:12.278000
313	00:00:12.317000
314	00:00:12.357000
315	00:00:12.396000
316	00:00:12.436000
317	00:00:12.475000
318	00:00:12.515000
319	00:00:12.555000
320	00:00:12.594000
321	00:00:12.634000
322	00:00:12.673000
323	00:00:12.713000
324	00:00:12.752000
325	00:00:12.792000
326	00:00:12.831000
327	00:00:12.871000
328	00:00:12.910000
329	00:00:12.950000
330	00:00:12.989000
331	00:00:13.029000
332	00:00:13.068000
333	00:00:13.108000
334	00:00:13.147000
335	00:00:13.187000
336	00:00:13.226000
337	00:00:13.266000
338	00:00:13.305000
339	00:00:13.345000
340	00:00:13.384000
341	00:00:13.424000
342	00:00:13.463000
343	00:00:13.503000
344	00:00:13.542000
345	00:00:13.582000
346	00:00:13.621000
347	00:00:13.661000
348	00:00:13.700000
349	00:00:13.740000
350	00:00:13.779000
351	00:00:13.819000
352	00:00:13.858000
353	00:00:13.898000
354	00:00:13.937000
355	00:00:13.977000
356	00:00:14.016000
357	00:00:14.056000
358	00:00:14.096000
359	00:00:14.135000
360	00:00:14.175000
361	00:00:14.214000
362	00:00:14.254000
363	00:00:14.293000
364	00:00:14.333000
365	00:00:14.372000
366	00:00:14.412000
367	00:00:14.451000
368	00:00:14.491000
369	00:00:14.530000
370	00:00:14.570000
371	00:00:14.609000
372	00:00:14.649000
373	00:00:14.688000
374	00:00:14.728000
375	00:00:14.767000
376	00:00:14.807000
377	00:00:14.846000
378	00:00:14.886000
379	00:00:14.925000
380	00:00:14.965000
381	00:00:15.003000
382	00:00:15.043000
383	00:00:15.082000
384	00:00:15.122000
385	00:00:15.161000
386	00:00:15.201000
387	00:00:15.240000
388	00:00:15.280000
389	00:00:15.319000
390	00:00:15.359000
391	00:00:15.398000
392	00:00:15.438000
393	00:00:15.477000
394	00:00:15.517000
395	00:00:15.557000
396	00:00:15.596000
397	00:00:15.636000
398	00:00:15.675000
399	00:00:15.714000
400	00:00:15.754000
401	00:00:15.793000
402	00:00:15.833000
403	00:00:15.873000
404	00:00:15.912000
405	00:00:15.952000
406	00:00:15.991000
407	00:00:16.031000
408	00:00:16.070000
409	00:00:16.110000
410	00:00:16.149000
411	00:00:16.189000
412	00:00:16.319000
413	00:00:16.320000
414	00:00:16.320000
415	00:00:16.347000
416	00:00:16.386000
417	00:00:16.426000
418	00:00:16.465000
419	00:00:16.505000
420	00:00:16.544000
421	00:00:16.584000
422	00:00:16.623000
423	00:00:16.663000
424	00:00:16.702000
425	00:00:16.742000
426	00:00:16.781000
427	00:00:16.821000
428	00:00:16.860000
429	00:00:16.900000
430	00:00:16.939000
431	00:00:16.979000
432	00:00:17.018000
433	00:00:17.058000
434	00:00:17.097000
435	00:00:17.137000
436	00:00:17.176000
437	00:00:17.216000
438	00:00:17.255000
439	00:00:17.295000
440	00:00:17.334000
441	00:00:17.374000
442	00:00:17.414000
443	00:00:17.453000
444	00:00:17.493000
445	00:00:17.532000
446	00:00:17.572000
447	00:00:17.611000
448	00:00:17.651000
449	00:00:17.690000
450	00:00:17.730000
451	00:00:17.769000
452	00:00:17.809000
453	00:00:17.848000
454	00:00:17.888000
455	00:00:17.927000
456	00:00:17.967000
457	00:00:18.006000
458	00:00:18.046000
459	00:00:18.085000
460	00:00:18.125000
461	00:00:18.164000
462	00:00:18.204000
463	00:00:18.243000
464	00:00:18.283000
465	00:00:18.322000
466	00:00:18.362000
467	00:00:18.401000
468	00:00:18.441000
469	00:00:18.480000
470	00:00:18.520000
471	00:00:18.559000
472	00:00:18.599000
473	00:00:18.638000
474	00:00:18.678000
475	00:00:18.717000
476	00:00:18.757000
477	00:00:18.796000
478	00:00:18.836000
479	00:00:18.875000
480	00:00:18.915000
481	00:00:18.955000
482	00:00:18.994000
483	00:00:19.034000
484	00:00:19.073000
485	00:00:19.113000
486	00:00:19.152000
487	00:00:19.192000
488	00:00:19.231000
489	00:00:19.271000
490	00:00:19.310000
491	00:00:19.350000
492	00:00:19.389000
493	00:00:19.429000
494	00:00:19.468000
495	00:00:19.508000
496	00:00:19.547000
497	00:00:19.587000
498	00:00:19.626000
499	00:00:19.666000
500	00:00:19.705000
501	00:00:19.745000
502	00:00:19.784000
503	00:00:19.824000
504	00:00:19.863000
505	00:00:19.903000
506	00:00:19.942000
507	00:00:19.982000
508	00:00:20.021000
509	00:00:20.061000
510	00:00:20.100000
511	00:00:20.140000
512	00:00:20.179000
513	00:00:20.219000
514	00:00:20.258000
515	00:00:20.298000
516	00:00:20.337000
517	00:00:20.377000
518	00:00:20.417000
519	00:00:20.456000
520	00:00:20.495000
521	00:00:20.535000
522	00:00:20.574000
523	00:00:20.614000
524	00:00:20.653000
525	00:00:20.693000
526	00:00:20.733000
527	00:00:20.772000
528	00:00:20.812000
529	00:00:20.851000
530	00:00:20.891000
531	00:00:20.930000
532	00:00:20.970000
533	00:00:21.009000
534	00:00:21.049000
535	00:00:21.088000
536	00:00:21.128000
537	00:00:21.167000
538	00:00:21.207000
539	00:00:21.246000
540	00:00:21.286000
541	00:00:21.325000
542	00:00:21.365000
543	00:00:21.404000
544	00:00:21.444000
545	00:00:21.483000
546	00:00:21.523000
547	00:00:21.562000
548	00:00:21.602000
549	00:00:21.641000
550	00:00:21.681000
551	00:00:21.720000
552	00:00:21.760000
553	00:00:21.799000
554	00:00:21.839000
555	00:00:21.878000
556	00:00:21.918000
557	00:00:21.957000
558	00:00:21.997000
559	00:00:22.036000
560	00:00:22.076000
561	00:00:22.115000
562	00:00:22.155000
563	00:00:22.194000
564	00:00:22.234000
565	00:00:22.274000
566	00:00:22.313000
567	00:00:22.353000
568	00:00:22.392000
569	00:00:22.432000
570	00:00:22.471000
571	00:00:22.511000
572	00:00:22.550000
573	00:00:22.590000
574	00:00:22.629000
575	00:00:22.669000
576	00:00:22.708000
577	00:00:22.748000
578	00:00:22.787000
579	00:00:22.827000
580	00:00:22.866000
581	00:00:22.906000
582	00:00:22.945000
583	00:00:22.985000
584	00:00:23.024000
585	00:00:23.064000
586	00:00:23.103000
587	00:00:23.143000
588	00:00:23.182000
589	00:00:23.222000
590	00:00:23.261000
591	00:00:23.301000
592	00:00:23.340000
593	00:00:23.380000
594	00:00:23.419000
595	00:00:23.459000
596	00:00:23.498000
597	00:00:23.538000
598	00:00:23.577000
599	00:00:23.617000
600	00:00:23.656000
601	00:00:23.696000
602	00:00:23.736000
603	00:00:23.775000
604	00:00:23.815000
605	00:00:23.854000
606	00:00:23.894000
607	00:00:23.933000
608	00:00:23.973000
609	00:00:24.012000
610	00:00:24.052000
611	00:00:24.091000
612	00:00:24.131000
613	00:00:24.170000
614	00:00:24.210000
615	00:00:24.249000
616	00:00:24.289000
617	00:00:24.328000
618	00:00:24.368000
619	00:00:24.407000
620	00:00:24.447000
621	00:00:24.486000
622	00:00:24.526000
623	00:00:24.565000
624	00:00:24.605000
625	00:00:24.644000
626	00:00:24.684000
627	00:00:24.723000
628	00:00:24.763000
629	00:00:24.802000
630	00:00:24.842000
631	00:00:24.881000
632	00:00:24.921000
633	00:00:24.960000
634	00:00:24.999000
635	00:00:25.038000
636	00:00:25.078000
637	00:00:25.117000
638	00:00:25.157000
639	00:00:25.196000
640	00:00:25.236000
641	00:00:25.276000
642	00:00:25.315000
643	00:00:25.355000
644	00:00:25.394000
645	00:00:25.433000
646	00:00:25.473000
647	00:00:25.512000
648	00:00:25.552000
649	00:00:25.592000
650	00:00:25.631000
651	00:00:25.671000
652	00:00:25.710000
653	00:00:25.750000
654	00:00:25.789000
655	00:00:25.829000
656	00:00:25.868000
657	00:00:25.908000
658	00:00:25.947000
659	00:00:25.987000
660	00:00:26.026000
661	00:00:26.066000
662	00:00:26.105000
663	00:00:26.145000
664	00:00:26.184000
665	00:00:26.224000
666	00:00:26.263000
667	00:00:26.303000
668	00:00:26.342000
669	00:00:26.382000
670	00:00:26.421000
671	00:00:26.461000
672	00:00:26.500000
673	00:00:26.540000
674	00:00:26.579000
675	00:00:26.619000
676	00:00:26.658000
677	00:00:26.698000
678	00:00:26.737000
679	00:00:26.777000
680	00:00:26.816000
681	00:00:26.856000
682	00:00:26.895000
683	00:00:26.935000
684	00:00:26.974000
685	00:00:27.014000
686	00:00:27.054000
687	00:00:27.093000
688	00:00:27.133000
689	00:00:27.172000
690	00:00:27.212000
691	00:00:27.251000
692	00:00:27.291000
693	00:00:27.330000
694	00:00:27.370000
695	00:00:27.409000
696	00:00:27.449000
697	00:00:27.488000
698	00:00:27.528000
699	00:00:27.567000
700	00:00:27.607000
701	00:00:27.646000
702	00:00:27.686000
703	00:00:27.725000
704	00:00:27.765000
705	00:00:27.804000
706	00:00:27.844000
707	00:00:27.883000
708	00:00:27.923000
709	00:00:27.962000
710	00:00:28.002000
711	00:00:28.041000
712	00:00:28.081000
713	00:00:28.120000
714	00:00:28.160000
715	00:00:28.199000
716	00:00:28.239000
717	00:00:28.278000
718	00:00:28.318000
719	00:00:28.357000
720	00:00:28.397000
721	00:00:28.436000
722	00:00:28.476000
723	00:00:28.515000
724	00:00:28.555000
725	00:00:28.595000
726	00:00:28.634000
727	00:00:28.674000
728	00:00:28.713000
729	00:00:28.753000
730	00:00:28.792000
731	00:00:28.832000
732	00:00:28.871000
733	00:00:28.911000
734	00:00:28.950000
735	00:00:28.990000
736	00:00:29.029000
737	00:00:29.069000
738	00:00:29.108000
739	00:00:29.148000
740	00:00:29.187000
741	00:00:29.227000
742	00:00:29.266000
743	00:00:29.306000
744	00:00:29.345000
745	00:00:29.385000
746	00:00:29.424000
747	00:00:29.464000
748	00:00:29.503000
749	00:00:29.543000
750	00:00:29.582000
751	00:00:29.622000
752	00:00:29.661000
753	00:00:29.701000
754	00:00:29.740000
755	00:00:29.780000
756	00:00:29.819000
757	00:00:29.859000
758	00:00:29.898000
759	00:00:29.938000
760	00:00:29.977000
761	00:00:30.017000
762	00:00:30.056000
763	00:00:30.096000
764	00:00:30.136000
765	00:00:30.175000
766	00:00:30.215000
767	00:00:30.254000
768	00:00:30.293000
769	00:00:30.333000
770	00:00:30.373000
771	00:00:30.412000
772	00:00:30.452000
773	00:00:30.491000
774	00:00:30.531000
775	00:00:30.570000
776	00:00:30.610000
777	00:00:30.649000
778	00:00:30.689000
779	00:00:30.728000
780	00:00:30.768000
781	00:00:30.807000
782	00:00:30.847000
783	00:00:30.886000
784	00:00:30.926000
785	00:00:30.965000
786	00:00:31.005000
787	00:00:31.044000
788	00:00:31.084000
789	00:00:31.123000
790	00:00:31.163000
791	00:00:31.202000
792	00:00:31.242000
793	00:00:31.281000
794	00:00:31.321000
795	00:00:31.360000
796	00:00:31.400000
797	00:00:31.439000
798	00:00:31.479000
799	00:00:31.518000
800	00:00:31.558000
801	00:00:31.597000
802	00:00:31.637000
803	00:00:31.676000
804	00:00:31.716000
805	00:00:31.755000
806	00:00:31.795000
807	00:00:31.834000
808	00:00:31.874000
809	00:00:31.914000
810	00:00:31.953000
811	00:00:31.993000
812	00:00:32.032000
813	00:00:32.072000
814	00:00:32.111000
815	00:00:32.151000
816	00:00:32.190000
817	00:00:32.230000
818	00:00:32.269000
819	00:00:32.309000
820	00:00:32.348000
821	00:00:32.388000
822	00:00:32.427000
823	00:00:32.467000
824	00:00:32.506000
825	00:00:32.546000
826	00:00:32.585000
827	00:00:32.625000
828	00:00:32.664000
829	00:00:32.704000
830	00:00:32.743000
831	00:00:32.783000
832	00:00:32.822000
833	00:00:32.862000
834	00:00:32.901000
835	00:00:32.941000
836	00:00:32.980000
837	00:00:33.020000
838	00:00:33.059000
839	00:00:33.099000
840	00:00:33.138000
841	00:00:33.178000
842	00:00:33.217000
843	00:00:33.257000
844	00:00:33.296000
845	00:00:33.336000
846	00:00:33.375000
847	00:00:33.415000
848	00:00:33.455000
849	00:00:33.494000
850	00:00:33.534000
851	00:00:33.573000
852	00:00:33.613000
853	00:00:33.652000
854	00:00:33.692000
855	00:00:33.731000
856	00:00:33.771000
857	00:00:33.810000
858	00:00:33.850000
859	00:00:33.889000
860	00:00:33.929000
861	00:00:33.968000
862	00:00:34.008000
863	00:00:34.047000
864	00:00:34.087000
865	00:00:34.126000
866	00:00:34.166000
867	00:00:34.205000
868	00:00:34.245000
869	00:00:34.284000
870	00:00:34.324000
871	00:00:34.363000
872	00:00:34.403000
873	00:00:34.442000
874	00:00:34.482000
875	00:00:34.521000
876	00:00:34.561000
877	00:00:34.600000
878	00:00:34.640000
879	00:00:34.679000
880	00:00:34.719000
881	00:00:34.758000
882	00:00:34.798000
883	00:00:34.837000
884	00:00:34.877000
885	00:00:34.917000
886	00:00:34.956000
887	00:00:34.996000
888	00:00:35.034000
889	00:00:35.074000
890	00:00:35.113000
891	00:00:35.152000
892	00:00:35.192000
893	00:00:35.232000
894	00:00:35.271000
895	00:00:35.311000
896	00:00:35.350000
897	00:00:35.390000
898	00:00:35.429000
899	00:00:35.469000
900	00:00:35.508000
901	00:00:35.548000
902	00:00:35.587000
903	00:00:35.627000
904	00:00:35.666000
905	00:00:35.706000
906	00:00:35.745000
907	00:00:35.785000
908	00:00:35.824000
909	00:00:35.864000
910	00:00:35.903000
911	00:00:35.943000
912	00:00:35.982000
913	00:00:36.022000
914	00:00:36.061000
915	00:00:36.101000
916	00:00:36.140000
917	00:00:36.180000
918	00:00:36.219000
919	00:00:36.259000
920	00:00:36.298000
921	00:00:36.338000
922	00:00:36.377000
923	00:00:36.417000
924	00:00:36.456000
925	00:00:36.496000
926	00:00:36.535000
927	00:00:36.575000
928	00:00:36.614000
929	00:00:36.654000
930	00:00:36.693000
931	00:00:36.733000
932	00:00:36.773000
933	00:00:36.812000
934	00:00:36.852000
935	00:00:36.891000
936	00:00:36.931000
937	00:00:36.970000
938	00:00:37.010000
939	00:00:37.049000
940	00:00:37.089000
941	00:00:37.128000
942	00:00:37.168000
943	00:00:37.207000
944	00:00:37.247000
945	00:00:37.286000
946	00:00:37.326000
947	00:00:37.365000
948	00:00:37.405000
949	00:00:37.444000
950	00:00:37.484000
951	00:00:37.523000
952	00:00:37.563000
953	00:00:37.602000
954	00:00:37.642000
955	00:00:37.681000
956	00:00:37.721000
957	00:00:37.760000
958	00:00:37.800000
959	00:00:37.839000
960	00:00:37.879000
961	00:00:37.918000
962	00:00:37.958000
963	00:00:37.997000
964	00:00:38.037000
965	00:00:38.076000
966	00:00:38.116000
967	00:00:38.155000
968	00:00:38.195000
969	00:00:38.235000
970	00:00:38.274000
971	00:00:38.314000
972	00:00:38.353000
973	00:00:38.393000
974	00:00:38.432000
975	00:00:38.472000
976	00:00:38.511000
977	00:00:38.551000
978	00:00:38.590000
979	00:00:38.630000
980	00:00:38.669000
981	00:00:38.709000
982	00:00:38.748000
983	00:00:38.788000
984	00:00:38.827000
985	00:00:38.867000

## Sheet: #2
frame	time	PC	TB	ant isth	mid isth	post isth
1	00:00:00
2	00:00:00.040000
3	00:00:00.079000
4	00:00:00.119000
5	00:00:00.172000
6	00:00:00.212000
7	00:00:00.252000
8	00:00:00.292000
9	00:00:00.332000
10	00:00:00.372000
11	00:00:00.412000
12	00:00:00.452000
13	00:00:00.492000
14	00:00:00.532000
15	00:00:00.562000
16	00:00:00.602000
17	00:00:00.633000
18	00:00:00.672000
19	00:00:00.711000
20	00:00:00.751000
21	00:00:00.790000
22	00:00:00.830000
23	00:00:00.869000
24	00:00:00.909000
25	00:00:00.948000
26	00:00:00.988000
27	00:00:01.027000
28	00:00:01.067000
29	00:00:01.106000
30	00:00:01.146000
31	00:00:01.185000
32	00:00:01.225000
33	00:00:01.264000
34	00:00:01.304000
35	00:00:01.343000
36	00:00:01.383000
37	00:00:01.422000
38	00:00:01.459000
39	00:00:01.499000
40	00:00:01.538000
41	00:00:01.578000
42	00:00:01.617000
43	00:00:01.657000
44	00:00:01.696000
45	00:00:01.736000
46	00:00:01.775000
47	00:00:01.815000
48	00:00:01.854000
49	00:00:01.894000
50	00:00:01.933000
51	00:00:01.973000
52	00:00:02.012000
53	00:00:02.052000
54	00:00:02.091000
55	00:00:02.131000
56	00:00:02.170000
57	00:00:02.210000
58	00:00:02.249000
59	00:00:02.289000
60	00:00:02.328000
61	00:00:02.368000
62	00:00:02.407000
63	00:00:02.447000
64	00:00:02.486000
65	00:00:02.526000
66	00:00:02.565000
67	00:00:02.605000
68	00:00:02.644000
69	00:00:02.684000
70	00:00:02.723000
71	00:00:02.763000
72	00:00:02.802000
73	00:00:02.842000
74	00:00:02.881000
75	00:00:02.921000
76	00:00:02.960000
77	00:00:03
78	00:00:03.040000
79	00:00:03.079000
80	00:00:03.119000
81	00:00:03.158000
82	00:00:03.198000
83	00:00:03.237000
84	00:00:03.277000
85	00:00:03.316000
86	00:00:03.356000
87	00:00:03.395000
88	00:00:03.435000
89	00:00:03.474000
90	00:00:03.514000
91	00:00:03.553000
92	00:00:03.593000
93	00:00:03.632000
94	00:00:03.672000
95	00:00:03.711000
96	00:00:03.751000
97	00:00:03.790000
98	00:00:03.830000
99	00:00:03.869000
100	00:00:03.909000
101	00:00:03.948000
102	00:00:03.988000
103	00:00:04.027000
104	00:00:04.067000
105	00:00:04.106000
106	00:00:04.146000
107	00:00:04.185000
108	00:00:04.225000
109	00:00:04.264000
110	00:00:04.304000
111	00:00:04.343000
112	00:00:04.383000
113	00:00:04.422000
114	00:00:04.462000
115	00:00:04.501000
116	00:00:04.541000
117	00:00:04.580000
118	00:00:04.620000
119	00:00:04.660000
120	00:00:04.699000
121	00:00:04.737000
122	00:00:04.777000
123	00:00:04.817000
124	00:00:04.856000
125	00:00:04.896000
126	00:00:04.935000
127	00:00:04.975000
128	00:00:05.014000
129	00:00:05.054000
130	00:00:05.093000
131	00:00:05.133000
132	00:00:05.172000
133	00:00:05.212000
134	00:00:05.251000
135	00:00:05.291000
136	00:00:05.330000
137	00:00:05.370000
138	00:00:05.409000
139	00:00:05.449000
140	00:00:05.488000
141	00:00:05.528000
142	00:00:05.567000
143	00:00:05.607000
144	00:00:05.646000
145	00:00:05.686000
146	00:00:05.725000
147	00:00:05.765000
148	00:00:05.804000
149	00:00:05.844000
150	00:00:05.883000
151	00:00:05.923000
152	00:00:05.962000
153	00:00:06.002000
154	00:00:06.042000
155	00:00:06.081000
156	00:00:06.120000
157	00:00:06.160000
158	00:00:06.199000
159	00:00:06.239000
160	00:00:06.278000
161	00:00:06.318000
162	00:00:06.358000
163	00:00:06.397000
164	00:00:06.437000
165	00:00:06.476000
166	00:00:06.516000
167	00:00:06.555000
168	00:00:06.595000
169	00:00:06.634000
170	00:00:06.674000
171	00:00:06.713000
172	00:00:06.753000
173	00:00:06.792000
174	00:00:06.832000
175	00:00:06.871000
176	00:00:06.911000
177	00:00:06.950000
178	00:00:06.990000
179	00:00:07.029000
180	00:00:07.069000
181	00:00:07.108000
182	00:00:07.148000
183	00:00:07.187000
184	00:00:07.227000
185	00:00:07.266000
186	00:00:07.306000
187	00:00:07.345000
188	00:00:07.385000
189	00:00:07.424000
190	00:00:07.464000
191	00:00:07.503000
192	00:00:07.543000
193	00:00:07.582000
194	00:00:07.622000
195	00:00:07.661000
196	00:00:07.701000
197	00:00:07.740000
198	00:00:07.780000
199	00:00:07.820000
200	00:00:07.859000
201	00:00:07.899000
202	00:00:07.938000
203	00:00:07.978000
204	00:00:08.017000
205	00:00:08.057000
206	00:00:08.096000
207	00:00:08.136000
208	00:00:08.175000
209	00:00:08.215000
210	00:00:08.254000
211	00:00:08.294000
212	00:00:08.333000
213	00:00:08.373000
214	00:00:08.412000
215	00:00:08.452000
216	00:00:08.491000
217	00:00:08.531000
218	00:00:08.570000
219	00:00:08.610000
220	00:00:08.649000
221	00:00:08.689000
222	00:00:08.728000
223	00:00:08.768000
224	00:00:08.807000
225	00:00:08.847000
226	00:00:08.886000
227	00:00:08.926000
228	00:00:08.965000
229	00:00:09.005000
230	00:00:09.044000
231	00:00:09.084000
232	00:00:09.123000
233	00:00:09.163000
234	00:00:09.202000
235	00:00:09.242000
236	00:00:09.281000
237	00:00:09.321000
238	00:00:09.361000
239	00:00:09.400000
240	00:00:09.439000
241	00:00:09.479000
242	00:00:09.518000
243	00:00:09.558000
244	00:00:09.597000
245	00:00:09.637000
246	00:00:09.677000
247	00:00:09.716000
248	00:00:09.756000
249	00:00:09.795000
250	00:00:09.835000
251	00:00:09.874000
252	00:00:09.914000
253	00:00:09.953000
254	00:00:09.993000
255	00:00:10.032000
256	00:00:10.072000
257	00:00:10.111000
258	00:00:10.151000
259	00:00:10.190000
260	00:00:10.230000
261	00:00:10.269000
262	00:00:10.309000
263	00:00:10.348000
264	00:00:10.388000
265	00:00:10.427000
266	00:00:10.467000
267	00:00:10.506000
268	00:00:10.546000
269	00:00:10.585000
270	00:00:10.625000
271	00:00:10.664000
272	00:00:10.704000
273	00:00:10.743000
274	00:00:10.783000
275	00:00:10.822000
276	00:00:10.862000
277	00:00:10.901000
278	00:00:10.941000
279	00:00:10.980000
280	00:00:11.020000
281	00:00:11.059000
282	00:00:11.099000
283	00:00:11.138000
284	00:00:11.178000
285	00:00:11.218000
286	00:00:11.257000
287	00:00:11.297000
288	00:00:11.336000
289	00:00:11.376000
290	00:00:11.415000
291	00:00:11.455000
292	00:00:11.494000
293	00:00:11.534000
294	00:00:11.573000
295	00:00:11.613000
296	00:00:11.652000
297	00:00:11.692000
298	00:00:11.731000
299	00:00:11.771000
300	00:00:11.810000
301	00:00:11.850000
302	00:00:11.889000
303	00:00:11.929000
304	00:00:11.968000
305	00:00:12.008000
306	00:00:12.047000
307	00:00:12.087000
308	00:00:12.126000
309	00:00:12.166000
310	00:00:12.205000
311	00:00:12.245000
312	00:00:12.284000
313	00:00:12.324000
314	00:00:12.363000
315	00:00:12.403000
316	00:00:12.442000
317	00:00:12.482000
318	00:00:12.521000
319	00:00:12.561000
320	00:00:12.600000
321	00:00:12.640000
322	00:00:12.680000
323	00:00:12.719000
324	00:00:12.759000
325	00:00:12.798000
326	00:00:12.838000
327	00:00:12.877000
328	00:00:12.917000
329	00:00:12.956000
330	00:00:12.996000
331	00:00:13.035000
332	00:00:13.075000
333	00:00:13.114000
334	00:00:13.154000
335	00:00:13.193000
336	00:00:13.233000
337	00:00:13.272000
338	00:00:13.312000
339	00:00:13.351000
340	00:00:13.391000
341	00:00:13.430000
342	00:00:13.470000
343	00:00:13.509000
344	00:00:13.549000
345	00:00:13.588000
346	00:00:13.628000
347	00:00:13.667000
348	00:00:13.707000
349	00:00:13.746000
350	00:00:13.786000
351	00:00:13.825000
352	00:00:13.865000
353	00:00:13.904000
354	00:00:13.944000
355	00:00:13.983000
356	00:00:14.023000
357	00:00:14.062000
358	00:00:14.102000
359	00:00:14.141000
360	00:00:14.181000
361	00:00:14.220000
362	00:00:14.260000
363	00:00:14.299000
364	00:00:14.339000
365	00:00:14.378000
366	00:00:14.418000
367	00:00:14.457000
368	00:00:14.497000
369	00:00:14.537000
370	00:00:14.576000
371	00:00:14.616000
372	00:00:14.655000
373	00:00:14.695000
374	00:00:14.733000
375	00:00:14.773000
376	00:00:14.812000
377	00:00:14.852000
378	00:00:14.891000
379	00:00:14.931000
380	00:00:14.970000
381	00:00:15.010000
382	00:00:15.049000
383	00:00:15.089000
384	00:00:15.128000
385	00:00:15.168000
386	00:00:15.207000
387	00:00:15.247000
388	00:00:15.286000
389	00:00:15.326000
390	00:00:15.365000
391	00:00:15.405000
392	00:00:15.444000
393	00:00:15.484000
394	00:00:15.523000
395	00:00:15.563000
396	00:00:15.602000
397	00:00:15.642000
398	00:00:15.681000
399	00:00:15.721000
400	00:00:15.760000
401	00:00:15.800000
402	00:00:15.839000
403	00:00:15.879000
404	00:00:15.918000
405	00:00:15.958000
406	00:00:15.998000
407	00:00:16.037000
408	00:00:16.077000
409	00:00:16.116000
410	00:00:16.156000
411	00:00:16.195000
412	00:00:16.235000
413	00:00:16.274000
414	00:00:16.314000
415	00:00:16.353000
416	00:00:16.393000
417	00:00:16.432000
418	00:00:16.472000
419	00:00:16.511000
420	00:00:16.551000
421	00:00:16.590000
422	00:00:16.630000
423	00:00:16.669000
424	00:00:16.709000
425	00:00:16.748000
426	00:00:16.788000
427	00:00:16.827000
428	00:00:16.867000
429	00:00:16.906000
430	00:00:16.946000
431	00:00:16.985000
432	00:00:17.025000
433	00:00:17.064000
434	00:00:17.104000
435	00:00:17.143000
436	00:00:17.183000
437	00:00:17.222000
438	00:00:17.262000
439	00:00:17.301000
440	00:00:17.341000
441	00:00:17.380000
442	00:00:17.420000
443	00:00:17.459000
444	00:00:17.499000
445	00:00:17.539000
446	00:00:17.578000
447	00:00:17.618000
448	00:00:17.657000
449	00:00:17.697000
450	00:00:17.736000
451	00:00:17.776000
452	00:00:17.815000
453	00:00:17.855000
454	00:00:17.894000
455	00:00:17.934000
456	00:00:17.973000
457	00:00:18.013000
458	00:00:18.052000
459	00:00:18.092000
460	00:00:18.131000
461	00:00:18.171000
462	00:00:18.210000
463	00:00:18.250000
464	00:00:18.289000
465	00:00:18.329000
466	00:00:18.368000
467	00:00:18.408000
468	00:00:18.447000
469	00:00:18.487000
470	00:00:18.526000
471	00:00:18.566000
472	00:00:18.605000
473	00:00:18.645000
474	00:00:18.684000
475	00:00:18.724000
476	00:00:18.763000
477	00:00:18.803000
478	00:00:18.842000
479	00:00:18.882000
480	00:00:18.921000
481	00:00:18.961000
482	00:00:19.001000
483	00:00:19.040000
484	00:00:19.080000
485	00:00:19.119000
486	00:00:19.159000
487	00:00:19.198000
488	00:00:19.237000
489	00:00:19.277000
490	00:00:19.317000
491	00:00:19.356000
492	00:00:19.396000
493	00:00:19.435000
494	00:00:19.475000
495	00:00:19.514000
496	00:00:19.554000
497	00:00:19.593000
498	00:00:19.633000
499	00:00:19.672000
500	00:00:19.712000
501	00:00:19.751000
502	00:00:19.791000
503	00:00:19.830000
504	00:00:19.870000
505	00:00:19.909000
506	00:00:19.949000
507	00:00:19.988000
508	00:00:20.028000
509	00:00:20.067000
510	00:00:20.107000
511	00:00:20.146000
512	00:00:20.186000
513	00:00:20.225000
514	00:00:20.265000
515	00:00:20.304000
516	00:00:20.344000
517	00:00:20.383000
518	00:00:20.423000
519	00:00:20.462000
520	00:00:20.502000
521	00:00:20.541000
522	00:00:20.581000
523	00:00:20.620000
524	00:00:20.660000
525	00:00:20.699000
526	00:00:20.739000
527	00:00:20.778000
528	00:00:20.818000
529	00:00:20.858000
530	00:00:20.897000
531	00:00:20.937000
532	00:00:20.976000
533	00:00:21.016000
534	00:00:21.055000
535	00:00:21.095000
536	00:00:21.134000
537	00:00:21.174000
538	00:00:21.213000
539	00:00:21.253000
540	00:00:21.292000
541	00:00:21.332000
542	00:00:21.371000
543	00:00:21.411000
544	00:00:21.450000
545	00:00:21.490000
546	00:00:21.529000
547	00:00:21.569000
548	00:00:21.608000
549	00:00:21.648000
550	00:00:21.687000
551	00:00:21.727000
552	00:00:21.766000
553	00:00:21.806000
554	00:00:21.845000
555	00:00:21.885000
556	00:00:21.924000
557	00:00:21.964000
558	00:00:22.003000
559	00:00:22.043000
560	00:00:22.082000
561	00:00:22.122000
562	00:00:22.161000
563	00:00:22.201000
564	00:00:22.240000
565	00:00:22.280000
566	00:00:22.319000
567	00:00:22.359000
568	00:00:22.399000
569	00:00:22.438000
570	00:00:22.478000
571	00:00:22.517000
572	00:00:22.557000
573	00:00:22.596000
574	00:00:22.636000
575	00:00:22.675000
576	00:00:22.715000
577	00:00:22.754000
578	00:00:22.794000
579	00:00:22.833000
580	00:00:22.873000
581	00:00:22.912000
582	00:00:22.952000
583	00:00:22.991000
584	00:00:23.031000
585	00:00:23.070000
586	00:00:23.110000
587	00:00:23.149000
588	00:00:23.189000
589	00:00:23.228000
590	00:00:23.268000
591	00:00:23.307000
592	00:00:23.347000
593	00:00:23.386000
594	00:00:23.426000
595	00:00:23.465000
596	00:00:23.505000
597	00:00:23.544000
598	00:00:23.584000
599	00:00:23.623000
600	00:00:23.663000

## Sheet: #3
frame	time	PC	TB	ant isth	mid isth	post isth
1	00:00:00
2	00:00:00.039000
3	00:00:00.079000
4	00:00:00.131000
5	00:00:00.171000
6	00:00:00.211000
7	00:00:00.251000
8	00:00:00.291000
9	00:00:00.331000
10	00:00:00.371000
11	00:00:00.411000
12	00:00:00.451000
13	00:00:00.491000
14	00:00:00.531000
15	00:00:00.562000
16	00:00:00.593000
17	00:00:00.632000
18	00:00:00.672000
19	00:00:00.711000
20	00:00:00.751000
21	00:00:00.790000
22	00:00:00.830000
23	00:00:00.869000
24	00:00:00.909000
25	00:00:00.948000
26	00:00:00.988000
27	00:00:01.027000
28	00:00:01.067000
29	00:00:01.106000
30	00:00:01.146000
31	00:00:01.185000
32	00:00:01.225000
33	00:00:01.264000
34	00:00:01.304000
35	00:00:01.343000
36	00:00:01.383000
37	00:00:01.422000
38	00:00:01.462000
39	00:00:01.501000
40	00:00:01.541000
41	00:00:01.580000
42	00:00:01.620000
43	00:00:01.660000
44	00:00:01.699000
45	00:00:01.739000
46	00:00:01.778000
47	00:00:01.818000
48	00:00:01.857000
49	00:00:01.897000
50	00:00:01.936000
51	00:00:01.976000
52	00:00:02.015000
53	00:00:02.055000
54	00:00:02.094000
55	00:00:02.134000
56	00:00:02.173000
57	00:00:02.213000
58	00:00:02.252000
59	00:00:02.292000
60	00:00:02.331000
61	00:00:02.371000
62	00:00:02.410000
63	00:00:02.450000
64	00:00:02.489000
65	00:00:02.529000
66	00:00:02.568000
67	00:00:02.608000
68	00:00:02.647000
69	00:00:02.687000
70	00:00:02.726000
71	00:00:02.766000
72	00:00:02.805000
73	00:00:02.845000
74	00:00:02.884000
75	00:00:02.924000
76	00:00:02.963000
77	00:00:03.003000
78	00:00:03.042000
79	00:00:03.082000
80	00:00:03.122000
81	00:00:03.161000
82	00:00:03.201000
83	00:00:03.240000
84	00:00:03.280000
85	00:00:03.319000
86	00:00:03.359000
87	00:00:03.398000
88	00:00:03.438000
89	00:00:03.477000
90	00:00:03.517000
91	00:00:03.556000
92	00:00:03.596000
93	00:00:03.635000
94	00:00:03.675000
95	00:00:03.714000
96	00:00:03.754000
97	00:00:03.793000
98	00:00:03.833000
99	00:00:03.872000
100	00:00:03.912000
101	00:00:03.951000
102	00:00:03.991000
103	00:00:04.030000
104	00:00:04.070000
105	00:00:04.109000
106	00:00:04.149000
107	00:00:04.188000
108	00:00:04.228000
109	00:00:04.267000
110	00:00:04.307000
111	00:00:04.346000
112	00:00:04.386000
113	00:00:04.425000
114	00:00:04.465000
115	00:00:04.504000
116	00:00:04.544000
117	00:00:04.583000
118	00:00:04.623000
119	00:00:04.663000
120	00:00:04.702000
121	00:00:04.741000
122	00:00:04.781000
123	00:00:04.820000
124	00:00:04.860000
125	00:00:04.899000
126	00:00:04.939000
127	00:00:04.979000
128	00:00:05.018000
129	00:00:05.058000
130	00:00:05.097000
131	00:00:05.137000
132	00:00:05.176000
133	00:00:05.216000
134	00:00:05.255000
135	00:00:05.295000
136	00:00:05.334000
137	00:00:05.374000
138	00:00:05.413000
139	00:00:05.453000
140	00:00:05.492000
141	00:00:05.532000
142	00:00:05.571000
143	00:00:05.611000
144	00:00:05.650000
145	00:00:05.690000
146	00:00:05.729000
147	00:00:05.769000
148	00:00:05.808000
149	00:00:05.848000
150	00:00:05.887000
151	00:00:05.927000
152	00:00:05.966000
153	00:00:06.006000
154	00:00:06.045000
155	00:00:06.085000
156	00:00:06.124000
157	00:00:06.164000
158	00:00:06.203000
159	00:00:06.243000
160	00:00:06.282000
161	00:00:06.322000
162	00:00:06.361000
163	00:00:06.401000
164	00:00:06.441000
165	00:00:06.480000
166	00:00:06.520000
167	00:00:06.559000
168	00:00:06.599000
169	00:00:06.638000
170	00:00:06.678000
171	00:00:06.717000
172	00:00:06.757000
173	00:00:06.796000
174	00:00:06.836000
175	00:00:06.875000
176	00:00:06.915000
177	00:00:06.954000
178	00:00:06.994000
179	00:00:07.033000
180	00:00:07.073000
181	00:00:07.112000
182	00:00:07.152000
183	00:00:07.191000
184	00:00:07.231000
185	00:00:07.270000
186	00:00:07.310000
187	00:00:07.349000
188	00:00:07.389000
189	00:00:07.428000
190	00:00:07.468000
191	00:00:07.507000
192	00:00:07.547000
193	00:00:07.586000
194	00:00:07.626000
195	00:00:07.665000
196	00:00:07.705000
197	00:00:07.744000
198	00:00:07.784000
199	00:00:07.823000
200	00:00:07.863000
201	00:00:07.902000
202	00:00:07.942000
203	00:00:07.982000
204	00:00:08.021000
205	00:00:08.061000
206	00:00:08.100000
207	00:00:08.139000
208	00:00:08.179000
209	00:00:08.219000
210	00:00:08.258000
211	00:00:08.298000
212	00:00:08.337000
213	00:00:08.377000
214	00:00:08.416000
215	00:00:08.456000
216	00:00:08.495000
217	00:00:08.535000
218	00:00:08.574000
219	00:00:08.614000
220	00:00:08.653000
221	00:00:08.693000
222	00:00:08.732000
223	00:00:08.772000
224	00:00:08.811000
225	00:00:08.851000
226	00:00:08.890000
227	00:00:08.930000
228	00:00:08.969000
229	00:00:09.009000
230	00:00:09.048000
231	00:00:09.088000
232	00:00:09.127000
233	00:00:09.167000
234	00:00:09.206000
235	00:00:09.246000
236	00:00:09.285000
237	00:00:09.325000
238	00:00:09.364000
239	00:00:09.404000
240	00:00:09.443000
241	00:00:09.483000
242	00:00:09.522000
243	00:00:09.562000
244	00:00:09.601000
245	00:00:09.641000
246	00:00:09.680000
247	00:00:09.720000
248	00:00:09.760000
249	00:00:09.799000
250	00:00:09.839000
251	00:00:09.878000
252	00:00:09.918000
253	00:00:09.957000
254	00:00:09.997000
255	00:00:10.036000
256	00:00:10.076000
257	00:00:10.115000
258	00:00:10.155000
259	00:00:10.194000
260	00:00:10.234000
261	00:00:10.273000
262	00:00:10.313000
263	00:00:10.352000
264	00:00:10.392000
265	00:00:10.431000
266	00:00:10.471000
267	00:00:10.510000
268	00:00:10.550000
269	00:00:10.589000
270	00:00:10.629000
271	00:00:10.668000
272	00:00:10.708000
273	00:00:10.747000
274	00:00:10.787000
275	00:00:10.826000
276	00:00:10.866000
277	00:00:10.905000
278	00:00:10.945000
279	00:00:10.984000
280	00:00:11.024000
281	00:00:11.063000
282	00:00:11.103000
283	00:00:11.142000
284	00:00:11.182000
285	00:00:11.221000
286	00:00:11.261000
287	00:00:11.301000
288	00:00:11.340000
289	00:00:11.380000
290	00:00:11.419000
291	00:00:11.459000
292	00:00:11.498000
293	00:00:11.538000
294	00:00:11.577000
295	00:00:11.617000
296	00:00:11.656000
297	00:00:11.696000
298	00:00:11.735000
299	00:00:11.775000
300	00:00:11.814000
301	00:00:11.854000
302	00:00:11.893000
303	00:00:11.933000
304	00:00:11.972000
305	00:00:12.012000
306	00:00:12.051000
307	00:00:12.091000
308	00:00:12.130000
309	00:00:12.170000
310	00:00:12.209000
311	00:00:12.249000
312	00:00:12.288000
313	00:00:12.328000
314	00:00:12.367000
315	00:00:12.407000
316	00:00:12.446000
317	00:00:12.486000
318	00:00:12.525000
319	00:00:12.565000
320	00:00:12.604000
321	00:00:12.644000
322	00:00:12.683000
323	00:00:12.723000
324	00:00:12.763000
325	00:00:12.802000
326	00:00:12.842000
327	00:00:12.881000
328	00:00:12.921000
329	00:00:12.960000
330	00:00:12.999000
331	00:00:13.039000
332	00:00:13.079000
333	00:00:13.118000
334	00:00:13.158000
335	00:00:13.197000
336	00:00:13.237000
337	00:00:13.276000
338	00:00:13.316000
339	00:00:13.355000
340	00:00:13.395000
341	00:00:13.434000
342	00:00:13.474000
343	00:00:13.513000
344	00:00:13.553000
345	00:00:13.592000
346	00:00:13.632000
347	00:00:13.671000
348	00:00:13.711000
349	00:00:13.750000
350	00:00:13.790000
351	00:00:13.829000
352	00:00:13.869000
353	00:00:13.908000
354	00:00:13.948000
355	00:00:13.987000
356	00:00:14.027000
357	00:00:14.066000
358	00:00:14.106000
359	00:00:14.145000
360	00:00:14.185000
361	00:00:14.224000
362	00:00:14.264000
363	00:00:14.303000
364	00:00:14.343000
365	00:00:14.382000
366	00:00:14.422000
367	00:00:14.461000
368	00:00:14.501000
369	00:00:14.540000
370	00:00:14.580000
371	00:00:14.620000
372	00:00:14.659000
373	00:00:14.699000
374	00:00:14.738000
375	00:00:14.778000
376	00:00:14.817000
377	00:00:14.857000
378	00:00:14.896000
379	00:00:14.936000
380	00:00:14.975000
381	00:00:15.015000
382	00:00:15.054000
383	00:00:15.094000
384	00:00:15.133000
385	00:00:15.173000
386	00:00:15.212000
387	00:00:15.252000
388	00:00:15.291000
389	00:00:15.331000
390	00:00:15.370000
391	00:00:15.410000
392	00:00:15.449000
393	00:00:15.489000
394	00:00:15.528000
395	00:00:15.568000
396	00:00:15.607000
397	00:00:15.647000
398	00:00:15.686000
399	00:00:15.726000
400	00:00:15.765000
401	00:00:15.805000
402	00:00:15.844000
403	00:00:15.884000
404	00:00:15.923000
405	00:00:15.963000
406	00:00:16.002000
407	00:00:16.042000
408	00:00:16.082000
409	00:00:16.121000
410	00:00:16.161000
411	00:00:16.200000
412	00:00:16.240000
413	00:00:16.279000
414	00:00:16.319000
415	00:00:16.358000
416	00:00:16.398000
417	00:00:16.437000
418	00:00:16.477000
419	00:00:16.516000
420	00:00:16.556000
421	00:00:16.595000
422	00:00:16.635000
423	00:00:16.674000
424	00:00:16.714000
425	00:00:16.753000
426	00:00:16.793000
427	00:00:16.832000
428	00:00:16.872000
429	00:00:16.911000
430	00:00:16.951000
431	00:00:16.990000
432	00:00:17.030000
433	00:00:17.069000
434	00:00:17.109000
435	00:00:17.148000
436	00:00:17.188000
437	00:00:17.227000
438	00:00:17.267000
439	00:00:17.306000
440	00:00:17.346000
441	00:00:17.385000
442	00:00:17.425000
443	00:00:17.464000
444	00:00:17.504000
445	00:00:17.543000
446	00:00:17.583000
447	00:00:17.623000
448	00:00:17.662000
449	00:00:17.702000
450	00:00:17.741000
451	00:00:17.781000
452	00:00:17.820000
453	00:00:17.859000
454	00:00:17.899000
455	00:00:17.939000
456	00:00:17.978000
457	00:00:18.018000
458	00:00:18.057000
459	00:00:18.097000
460	00:00:18.136000
461	00:00:18.176000
462	00:00:18.215000
463	00:00:18.255000
464	00:00:18.294000
465	00:00:18.334000
466	00:00:18.373000
467	00:00:18.413000
468	00:00:18.452000
469	00:00:18.492000
470	00:00:18.531000
471	00:00:18.571000
472	00:00:18.610000
473	00:00:18.650000
474	00:00:18.689000
475	00:00:18.729000
476	00:00:18.768000
477	00:00:18.808000
478	00:00:18.847000
479	00:00:18.887000
480	00:00:18.926000
481	00:00:18.966000
482	00:00:19.005000
483	00:00:19.045000
484	00:00:19.084000
485	00:00:19.124000
486	00:00:19.163000
487	00:00:19.203000
488	00:00:19.242000
489	00:00:19.282000
490	00:00:19.321000
491	00:00:19.361000
492	00:00:19.400000
493	00:00:19.440000
494	00:00:19.480000
495	00:00:19.519000
496	00:00:19.559000
497	00:00:19.598000
498	00:00:19.638000
499	00:00:19.677000
500	00:00:19.717000
501	00:00:19.756000
502	00:00:19.796000
503	00:00:19.835000
504	00:00:19.875000
505	00:00:19.914000
506	00:00:19.954000
507	00:00:19.993000
508	00:00:20.033000
509	00:00:20.072000
510	00:00:20.112000
511	00:00:20.151000
512	00:00:20.191000
513	00:00:20.230000
514	00:00:20.270000
515	00:00:20.309000
516	00:00:20.349000
517	00:00:20.388000
518	00:00:20.428000
519	00:00:20.467000
520	00:00:20.507000
521	00:00:20.546000
522	00:00:20.586000
523	00:00:20.625000
524	00:00:20.665000
525	00:00:20.704000
526	00:00:20.744000
527	00:00:20.783000
528	00:00:20.823000
529	00:00:20.862000
530	00:00:20.902000
531	00:00:20.942000
532	00:00:20.981000
533	00:00:21.021000
534	00:00:21.060000
535	00:00:21.100000
536	00:00:21.139000
537	00:00:21.179000
538	00:00:21.218000
539	00:00:21.258000
540	00:00:21.297000
541	00:00:21.337000
542	00:00:21.376000
543	00:00:21.416000
544	00:00:21.455000
545	00:00:21.495000
546	00:00:21.534000
547	00:00:21.574000
548	00:00:21.613000
549	00:00:21.653000
550	00:00:21.692000
551	00:00:21.732000
552	00:00:21.771000
553	00:00:21.811000

## Sheet: #4
frame	time	PC	TB	ant isth	mid isth	post isth
100	00:00:03.912000
101	00:00:03.952000
102	00:00:03.991000
103	00:00:04.031000
104	00:00:04.070000
105	00:00:04.110000
106	00:00:04.149000
107	00:00:04.189000
108	00:00:04.228000
109	00:00:04.268000
110	00:00:04.307000
111	00:00:04.347000
112	00:00:04.386000
113	00:00:04.426000
114	00:00:04.465000
115	00:00:04.505000
116	00:00:04.544000
117	00:00:04.584000
118	00:00:04.623000
119	00:00:04.663000
120	00:00:04.702000
121	00:00:04.742000
122	00:00:04.781000
123	00:00:04.821000
124	00:00:04.860000
125	00:00:04.900000
126	00:00:04.939000
127	00:00:04.979000
128	00:00:05.018000
129	00:00:05.058000
130	00:00:05.097000
131	00:00:05.137000
132	00:00:05.176000
133	00:00:05.216000
134	00:00:05.255000
135	00:00:05.295000
136	00:00:05.334000
137	00:00:05.374000
138	00:00:05.414000
139	00:00:05.453000
140	00:00:05.493000
141	00:00:05.532000
142	00:00:05.571000
143	00:00:05.611000
144	00:00:05.650000
145	00:00:05.690000
146	00:00:05.730000
147	00:00:05.769000
148	00:00:05.809000
149	00:00:05.848000
150	00:00:05.888000
151	00:00:05.927000
152	00:00:05.967000
153	00:00:06.006000
154	00:00:06.046000
155	00:00:06.085000
156	00:00:06.125000
157	00:00:06.164000
158	00:00:06.204000
159	00:00:06.243000
160	00:00:06.283000
161	00:00:06.322000
162	00:00:06.362000
163	00:00:06.401000
164	00:00:06.441000
165	00:00:06.480000
166	00:00:06.520000
167	00:00:06.559000
168	00:00:06.599000
169	00:00:06.638000
170	00:00:06.678000
171	00:00:06.717000
172	00:00:06.757000
173	00:00:06.796000
174	00:00:06.836000
175	00:00:06.875000
176	00:00:06.915000
177	00:00:06.954000
178	00:00:06.994000
179	00:00:07.033000
180	00:00:07.073000
181	00:00:07.112000
182	00:00:07.152000
183	00:00:07.191000
184	00:00:07.231000
185	00:00:07.271000
186	00:00:07.310000
187	00:00:07.350000
188	00:00:07.389000
189	00:00:07.429000
190	00:00:07.468000
191	00:00:07.508000
192	00:00:07.547000
193	00:00:07.587000
194	00:00:07.626000
195	00:00:07.666000
196	00:00:07.705000
197	00:00:07.745000
198	00:00:07.784000
199	00:00:07.824000
200	00:00:07.863000
201	00:00:07.903000
202	00:00:07.942000
203	00:00:07.982000
204	00:00:08.021000
205	00:00:08.061000
206	00:00:08.100000
207	00:00:08.140000
208	00:00:08.179000
209	00:00:08.219000
210	00:00:08.258000
211	00:00:08.298000
212	00:00:08.337000
213	00:00:08.377000
214	00:00:08.416000
215	00:00:08.456000
216	00:00:08.495000
217	00:00:08.535000
218	00:00:08.574000
219	00:00:08.614000
220	00:00:08.653000
221	00:00:08.693000
222	00:00:08.733000
223	00:00:08.772000
224	00:00:08.812000
225	00:00:08.851000
226	00:00:08.891000
227	00:00:08.930000
228	00:00:08.970000
229	00:00:09.009000
230	00:00:09.049000
231	00:00:09.088000
232	00:00:09.128000
233	00:00:09.167000
234	00:00:09.207000
235	00:00:09.246000
236	00:00:09.286000
237	00:00:09.325000
238	00:00:09.365000
239	00:00:09.404000
240	00:00:09.444000
241	00:00:09.483000
242	00:00:09.523000
243	00:00:09.562000
244	00:00:09.602000
245	00:00:09.641000
246	00:00:09.681000
247	00:00:09.720000
248	00:00:09.760000
249	00:00:09.799000
250	00:00:09.839000
251	00:00:09.878000
252	00:00:09.918000
253	00:00:09.957000
254	00:00:09.997000
255	00:00:10.036000
256	00:00:10.076000
257	00:00:10.115000
258	00:00:10.155000
259	00:00:10.194000
260	00:00:10.234000
261	00:00:10.273000
262	00:00:10.313000
263	00:00:10.352000
264	00:00:10.392000
265	00:00:10.431000
266	00:00:10.471000
267	00:00:10.510000
268	00:00:10.550000
269	00:00:10.590000
270	00:00:10.629000
271	00:00:10.669000
272	00:00:10.708000
273	00:00:10.748000
274	00:00:10.787000
275	00:00:10.827000
276	00:00:10.866000
277	00:00:10.906000
278	00:00:10.945000
279	00:00:10.985000
280	00:00:11.024000
281	00:00:11.064000
282	00:00:11.103000
283	00:00:11.143000
284	00:00:11.182000
285	00:00:11.222000
286	00:00:11.261000
287	00:00:11.301000
288	00:00:11.340000
289	00:00:11.380000
290	00:00:11.419000
291	00:00:11.459000
292	00:00:11.498000
293	00:00:11.538000
294	00:00:11.577000
295	00:00:11.617000
296	00:00:11.656000
297	00:00:11.696000
298	00:00:11.735000
299	00:00:11.775000
300	00:00:11.814000
301	00:00:11.854000
302	00:00:11.893000
303	00:00:11.933000
304	00:00:11.972000
305	00:00:12.012000
306	00:00:12.052000
307	00:00:12.091000
308	00:00:12.131000
309	00:00:12.170000
310	00:00:12.210000
311	00:00:12.249000
312	00:00:12.289000
313	00:00:12.328000
314	00:00:12.368000
315	00:00:12.407000
316	00:00:12.447000
317	00:00:12.486000
318	00:00:12.526000
319	00:00:12.565000
320	00:00:12.605000
321	00:00:12.644000
322	00:00:12.684000
323	00:00:12.723000
324	00:00:12.763000
325	00:00:12.802000
326	00:00:12.842000
327	00:00:12.881000
328	00:00:12.921000
329	00:00:12.960000
330	00:00:13
331	00:00:13.039000
332	00:00:13.079000
333	00:00:13.118000
334	00:00:13.158000
335	00:00:13.197000
336	00:00:13.237000
337	00:00:13.276000
338	00:00:13.316000
339	00:00:13.355000
340	00:00:13.395000
341	00:00:13.434000
342	00:00:13.474000
343	00:00:13.513000
344	00:00:13.553000
345	00:00:13.593000
346	00:00:13.632000
347	00:00:13.671000
348	00:00:13.711000
349	00:00:13.751000
350	00:00:13.790000
351	00:00:13.829000
352	00:00:13.869000
353	00:00:13.909000
354	00:00:13.948000
355	00:00:13.988000
356	00:00:14.027000
357	00:00:14.067000
358	00:00:14.106000
359	00:00:14.146000
360	00:00:14.185000
361	00:00:14.225000
362	00:00:14.264000
363	00:00:14.304000
364	00:00:14.343000
365	00:00:14.383000
366	00:00:14.422000
367	00:00:14.462000
368	00:00:14.501000
369	00:00:14.541000
370	00:00:14.580000
371	00:00:14.620000
372	00:00:14.659000
373	00:00:14.699000
374	00:00:14.738000
375	00:00:14.778000
376	00:00:14.817000
377	00:00:14.857000
378	00:00:14.896000
379	00:00:14.936000
380	00:00:14.975000
381	00:00:15.015000
382	00:00:15.054000
383	00:00:15.094000
384	00:00:15.133000
385	00:00:15.173000
386	00:00:15.212000
387	00:00:15.252000
388	00:00:15.291000
389	00:00:15.331000
390	00:00:15.371000
391	00:00:15.410000
392	00:00:15.450000
393	00:00:15.489000
394	00:00:15.529000
395	00:00:15.568000
396	00:00:15.608000
397	00:00:15.647000
398	00:00:15.687000
399	00:00:15.726000
400	00:00:15.766000
401	00:00:15.805000
402	00:00:15.845000
403	00:00:15.884000
404	00:00:15.924000
405	00:00:15.963000
406	00:00:16.003000
407	00:00:16.042000
408	00:00:16.082000
409	00:00:16.121000
410	00:00:16.161000
411	00:00:16.200000
412	00:00:16.240000
413	00:00:16.279000
414	00:00:16.319000
415	00:00:16.358000
416	00:00:16.398000
417	00:00:16.437000
418	00:00:16.477000
419	00:00:16.516000
420	00:00:16.556000
421	00:00:16.595000
422	00:00:16.635000
423	00:00:16.674000
424	00:00:16.714000
425	00:00:16.753000
426	00:00:16.793000
427	00:00:16.832000
428	00:00:16.872000
429	00:00:16.912000
430	00:00:16.951000
431	00:00:16.991000
432	00:00:17.030000
433	00:00:17.070000
434	00:00:17.109000
435	00:00:17.149000
436	00:00:17.188000
437	00:00:17.228000
438	00:00:17.267000
439	00:00:17.307000
440	00:00:17.346000
441	00:00:17.386000
442	00:00:17.425000
443	00:00:17.465000
444	00:00:17.504000
445	00:00:17.544000
446	00:00:17.583000
447	00:00:17.623000
448	00:00:17.662000
449	00:00:17.702000
450	00:00:17.741000
451	00:00:17.781000
452	00:00:17.820000
453	00:00:17.860000
454	00:00:17.899000
455	00:00:17.939000
456	00:00:17.978000
457	00:00:18.018000
458	00:00:18.057000
459	00:00:18.097000
460	00:00:18.136000
461	00:00:18.176000
462	00:00:18.215000
463	00:00:18.255000
464	00:00:18.294000
465	00:00:18.334000
466	00:00:18.374000
467	00:00:18.413000
468	00:00:18.453000
469	00:00:18.492000
470	00:00:18.532000
471	00:00:18.571000
472	00:00:18.610000
473	00:00:18.650000
474	00:00:18.690000
475	00:00:18.729000
476	00:00:18.769000
477	00:00:18.808000
478	00:00:18.848000
479	00:00:18.887000
480	00:00:18.927000
481	00:00:18.966000
482	00:00:19.006000
483	00:00:19.045000
484	00:00:19.085000
485	00:00:19.124000
486	00:00:19.164000
487	00:00:19.203000
488	00:00:19.243000
489	00:00:19.282000
490	00:00:19.322000
491	00:00:19.361000
492	00:00:19.401000
493	00:00:19.440000
494	00:00:19.480000
495	00:00:19.519000
496	00:00:19.559000
497	00:00:19.598000
498	00:00:19.638000
499	00:00:19.677000
500	00:00:19.717000
501	00:00:19.756000
502	00:00:19.796000
503	00:00:19.835000
504	00:00:19.875000
505	00:00:19.914000
506	00:00:19.954000
507	00:00:19.993000
508	00:00:20.033000
509	00:00:20.072000
510	00:00:20.112000
511	00:00:20.151000
512	00:00:20.191000
513	00:00:20.231000
514	00:00:20.270000
515	00:00:20.310000
516	00:00:20.349000
517	00:00:20.389000
518	00:00:20.428000
519	00:00:20.468000
520	00:00:20.507000
521	00:00:20.547000
522	00:00:20.586000
523	00:00:20.626000
524	00:00:20.665000
525	00:00:20.705000
526	00:00:20.744000
527	00:00:20.784000
528	00:00:20.823000
529	00:00:20.863000
530	00:00:20.902000
531	00:00:20.942000
532	00:00:20.981000
533	00:00:21.021000
534	00:00:21.060000
535	00:00:21.100000
536	00:00:21.139000
537	00:00:21.179000
538	00:00:21.218000
539	00:00:21.258000
540	00:00:21.297000
541	00:00:21.337000
542	00:00:21.376000
543	00:00:21.416000
544	00:00:21.455000
545	00:00:21.495000
546	00:00:21.534000
547	00:00:21.574000
548	00:00:21.613000
549	00:00:21.653000
550	00:00:21.693000
551	00:00:21.732000
552	00:00:21.772000
553	00:00:21.811000
554	00:00:21.851000
555	00:00:21.890000
556	00:00:21.930000
557	00:00:21.969000
558	00:00:22.009000
559	00:00:22.048000
560	00:00:22.088000
561	00:00:22.127000
562	00:00:22.167000
563	00:00:22.206000
564	00:00:22.246000
565	00:00:22.285000
566	00:00:22.325000
567	00:00:22.364000
568	00:00:22.404000
569	00:00:22.443000
570	00:00:22.483000
571	00:00:22.522000
572	00:00:22.562000
573	00:00:22.601000
574	00:00:22.641000
575	00:00:22.680000
576	00:00:22.720000
577	00:00:22.759000
578	00:00:22.799000
579	00:00:22.838000
580	00:00:22.878000
581	00:00:22.917000
582	00:00:22.957000
583	00:00:22.996000
584	00:00:23.036000
585	00:00:23.075000
586	00:00:23.115000
587	00:00:23.154000
588	00:00:23.194000
589	00:00:23.234000
590	00:00:23.273000
591	00:00:23.313000
592	00:00:23.352000
593	00:00:23.392000
594	00:00:23.431000
595	00:00:23.470000
596	00:00:23.510000
597	00:00:23.550000
598	00:00:23.589000
599	00:00:23.629000
600	00:00:23.668000
601	00:00:23.708000
602	00:00:23.747000
603	00:00:23.787000
604	00:00:23.826000
605	00:00:23.866000
606	00:00:23.905000
607	00:00:23.945000
608	00:00:23.984000
609	00:00:24.024000
610	00:00:24.063000
611	00:00:24.103000
612	00:00:24.142000
613	00:00:24.182000
614	00:00:24.221000
615	00:00:24.261000
616	00:00:24.300000
617	00:00:24.340000
618	00:00:24.379000
619	00:00:24.419000
620	00:00:24.458000
621	00:00:24.498000
622	00:00:24.537000
623	00:00:24.577000
624	00:00:24.616000
625	00:00:24.656000
626	00:00:24.695000
627	00:00:24.735000
628	00:00:24.775000
629	00:00:24.814000
630	00:00:24.854000
631	00:00:24.893000
632	00:00:24.932000
633	00:00:24.972000
634	00:00:25.012000
635	00:00:25.051000
636	00:00:25.091000
637	00:00:25.130000
638	00:00:25.170000
639	00:00:25.209000
640	00:00:25.249000
641	00:00:25.288000
642	00:00:25.328000
643	00:00:25.367000
644	00:00:25.407000
645	00:00:25.446000
646	00:00:25.486000
647	00:00:25.525000
648	00:00:25.565000
649	00:00:25.604000
650	00:00:25.644000
651	00:00:25.683000
652	00:00:25.723000
653	00:00:25.762000
654	00:00:25.802000
655	00:00:25.841000
656	00:00:25.881000
657	00:00:25.920000
658	00:00:25.960000
659	00:00:25.999000
660	00:00:26.039000
661	00:00:26.078000
662	00:00:26.118000
663	00:00:26.157000
664	00:00:26.197000
665	00:00:26.236000
666	00:00:26.276000
667	00:00:26.315000
668	00:00:26.355000
669	00:00:26.394000
670	00:00:26.434000
671	00:00:26.473000
672	00:00:26.513000
673	00:00:26.553000
674	00:00:26.592000
675	00:00:26.632000
676	00:00:26.671000
677	00:00:26.711000
678	00:00:26.750000
679	00:00:26.790000
680	00:00:26.829000
681	00:00:26.869000
682	00:00:26.908000
683	00:00:26.948000
684	00:00:26.987000
685	00:00:27.027000
686	00:00:27.066000
687	00:00:27.106000
688	00:00:27.145000
689	00:00:27.185000
690	00:00:27.224000
691	00:00:27.264000
692	00:00:27.303000
693	00:00:27.343000
694	00:00:27.382000
695	00:00:27.422000
696	00:00:27.461000
697	00:00:27.501000
698	00:00:27.540000
699	00:00:27.580000
700	00:00:27.619000
701	00:00:27.659000
702	00:00:27.698000
703	00:00:27.738000
704	00:00:27.777000
705	00:00:27.817000
706	00:00:27.856000
707	00:00:27.896000
708	00:00:27.935000
709	00:00:27.975000
710	00:00:28.014000
711	00:00:28.054000
712	00:00:28.094000
713	00:00:28.133000
714	00:00:28.173000
715	00:00:28.212000
716	00:00:28.252000
717	00:00:28.291000
718	00:00:28.331000
719	00:00:28.370000
720	00:00:28.410000
721	00:00:28.449000
722	00:00:28.489000
723	00:00:28.528000
724	00:00:28.568000
725	00:00:28.607000
726	00:00:28.647000
727	00:00:28.686000
728	00:00:28.726000
729	00:00:28.765000
730	00:00:28.805000
731	00:00:28.844000
732	00:00:28.884000
733	00:00:28.923000
734	00:00:28.963000
735	00:00:29.002000
736	00:00:29.042000
737	00:00:29.081000

## Sheet: #6
frame	time	PC	TB	ant isth	mid isth	post isth
1	00:00:00
2	00:00:00.040000
3	00:00:00.079000
4	00:00:00.119000
5	00:00:00.169000
6	00:00:00.209000
7	00:00:00.249000
8	00:00:00.289000
9	00:00:00.329000
10	00:00:00.369000
11	00:00:00.409000
12	00:00:00.449000
13	00:00:00.489000
14	00:00:00.529000
15	00:00:00.569000
16	00:00:00.600000
17	00:00:00.633000
18	00:00:00.672000
19	00:00:00.712000
20	00:00:00.751000
21	00:00:00.791000
22	00:00:00.830000
23	00:00:00.870000
24	00:00:00.909000
25	00:00:00.949000
26	00:00:00.988000
27	00:00:01.028000
28	00:00:01.067000
29	00:00:01.107000
30	00:00:01.146000
31	00:00:01.186000
32	00:00:01.225000
33	00:00:01.265000
34	00:00:01.304000
35	00:00:01.344000
36	00:00:01.383000
37	00:00:01.423000
38	00:00:01.462000
39	00:00:01.502000
40	00:00:01.541000
41	00:00:01.581000
42	00:00:01.620000
43	00:00:01.660000
44	00:00:01.699000
45	00:00:01.739000
46	00:00:01.778000
47	00:00:01.818000
48	00:00:01.857000
49	00:00:01.897000
50	00:00:01.936000
51	00:00:01.976000
52	00:00:02.016000
53	00:00:02.055000
54	00:00:02.095000
55	00:00:02.134000
56	00:00:02.174000
57	00:00:02.213000
58	00:00:02.253000
59	00:00:02.292000
60	00:00:02.332000
61	00:00:02.371000
62	00:00:02.411000
63	00:00:02.450000
64	00:00:02.490000
65	00:00:02.529000
66	00:00:02.569000
67	00:00:02.608000
68	00:00:02.648000
69	00:00:02.687000
70	00:00:02.727000
71	00:00:02.766000
72	00:00:02.806000
73	00:00:02.845000
74	00:00:02.885000
75	00:00:02.924000
76	00:00:02.964000
77	00:00:03.003000
78	00:00:03.043000
79	00:00:03.082000
80	00:00:03.122000
81	00:00:03.161000
82	00:00:03.201000
83	00:00:03.240000
84	00:00:03.280000
85	00:00:03.319000
86	00:00:03.359000
87	00:00:03.398000
88	00:00:03.438000
89	00:00:03.478000
90	00:00:03.517000
91	00:00:03.557000
92	00:00:03.596000
93	00:00:03.636000
94	00:00:03.675000
95	00:00:03.715000
96	00:00:03.754000
97	00:00:03.794000
98	00:00:03.833000
99	00:00:03.873000
100	00:00:03.912000
101	00:00:03.952000
102	00:00:03.991000
103	00:00:04.031000
104	00:00:04.070000
105	00:00:04.110000
106	00:00:04.149000
107	00:00:04.189000
108	00:00:04.228000
109	00:00:04.268000
110	00:00:04.307000
111	00:00:04.347000
112	00:00:04.386000
113	00:00:04.426000
114	00:00:04.465000
115	00:00:04.505000
116	00:00:04.544000
117	00:00:04.584000
118	00:00:04.623000
119	00:00:04.663000
120	00:00:04.702000
121	00:00:04.742000
122	00:00:04.781000
123	00:00:04.821000
124	00:00:04.860000
125	00:00:04.900000
126	00:00:04.939000
127	00:00:04.979000
128	00:00:05.019000
129	00:00:05.058000
130	00:00:05.098000
131	00:00:05.137000
132	00:00:05.177000
133	00:00:05.216000
134	00:00:05.255000
135	00:00:05.295000
136	00:00:05.335000
137	00:00:05.374000
138	00:00:05.415000
139	00:00:05.454000
140	00:00:05.494000
141	00:00:05.533000
142	00:00:05.573000
143	00:00:05.612000
144	00:00:05.652000
145	00:00:05.691000
146	00:00:05.731000
147	00:00:05.770000
148	00:00:05.810000
149	00:00:05.849000
150	00:00:05.889000
151	00:00:05.928000
152	00:00:05.968000
153	00:00:06.007000
154	00:00:06.047000
155	00:00:06.086000
156	00:00:06.126000
157	00:00:06.165000
158	00:00:06.205000
159	00:00:06.244000
160	00:00:06.284000
161	00:00:06.323000
162	00:00:06.363000
163	00:00:06.402000
164	00:00:06.442000
165	00:00:06.481000
166	00:00:06.521000
167	00:00:06.560000
168	00:00:06.600000
169	00:00:06.639000
170	00:00:06.679000
171	00:00:06.718000
172	00:00:06.758000
173	00:00:06.798000
174	00:00:06.837000
175	00:00:06.877000
176	00:00:06.916000
177	00:00:06.956000
178	00:00:06.995000
179	00:00:07.035000
180	00:00:07.074000
181	00:00:07.114000
182	00:00:07.153000
183	00:00:07.193000
184	00:00:07.232000
185	00:00:07.272000
186	00:00:07.311000
187	00:00:07.351000
188	00:00:07.390000
189	00:00:07.430000
190	00:00:07.469000
191	00:00:07.509000
192	00:00:07.548000
193	00:00:07.588000
194	00:00:07.627000
195	00:00:07.667000
196	00:00:07.706000
197	00:00:07.746000
198	00:00:07.785000
199	00:00:07.825000
200	00:00:07.864000
201	00:00:07.904000
202	00:00:07.943000
203	00:00:07.983000
204	00:00:08.022000
205	00:00:08.062000
206	00:00:08.101000
207	00:00:08.141000
208	00:00:08.180000
209	00:00:08.220000
210	00:00:08.259000
211	00:00:08.299000
212	00:00:08.339000
213	00:00:08.378000
214	00:00:08.418000
215	00:00:08.457000
216	00:00:08.497000
217	00:00:08.536000
218	00:00:08.576000
219	00:00:08.615000
220	00:00:08.655000
221	00:00:08.694000
222	00:00:08.734000
223	00:00:08.773000
224	00:00:08.813000
225	00:00:08.852000
226	00:00:08.892000
227	00:00:08.931000
228	00:00:08.971000
229	00:00:09.010000
230	00:00:09.050000
231	00:00:09.089000
232	00:00:09.129000
233	00:00:09.168000
234	00:00:09.208000
235	00:00:09.247000
236	00:00:09.287000
237	00:00:09.326000
238	00:00:09.366000
239	00:00:09.405000
240	00:00:09.445000
241	00:00:09.484000
242	00:00:09.524000
243	00:00:09.563000
244	00:00:09.603000
245	00:00:09.642000
246	00:00:09.682000
247	00:00:09.721000
248	00:00:09.761000
249	00:00:09.800000
250	00:00:09.840000
251	00:00:09.880000
252	00:00:09.919000
253	00:00:09.959000
254	00:00:09.998000
255	00:00:10.037000
256	00:00:10.077000
257	00:00:10.117000
258	00:00:10.156000
259	00:00:10.196000
260	00:00:10.235000
261	00:00:10.275000
262	00:00:10.314000
263	00:00:10.354000
264	00:00:10.393000
265	00:00:10.433000
266	00:00:10.472000
267	00:00:10.512000
268	00:00:10.551000
269	00:00:10.591000
270	00:00:10.630000
271	00:00:10.670000
272	00:00:10.709000
273	00:00:10.749000
274	00:00:10.788000
275	00:00:10.828000
276	00:00:10.867000
277	00:00:10.907000
278	00:00:10.946000
279	00:00:10.986000
280	00:00:11.025000
281	00:00:11.065000
282	00:00:11.104000
283	00:00:11.144000
284	00:00:11.183000
285	00:00:11.223000
286	00:00:11.262000
287	00:00:11.302000
288	00:00:11.342000
289	00:00:11.381000
290	00:00:11.420000
291	00:00:11.460000
292	00:00:11.500000
293	00:00:11.539000
294	00:00:11.578000
295	00:00:11.618000
296	00:00:11.658000
297	00:00:11.697000
298	00:00:11.737000
299	00:00:11.776000
300	00:00:11.816000
301	00:00:11.855000
302	00:00:11.895000
303	00:00:11.934000
304	00:00:11.974000
305	00:00:12.009000
306	00:00:12.049000
307	00:00:12.088000
308	00:00:12.128000
309	00:00:12.167000
310	00:00:12.207000
311	00:00:12.243000
312	00:00:12.283000
313	00:00:12.322000
314	00:00:12.362000
315	00:00:12.401000
316	00:00:12.441000
317	00:00:12.480000
318	00:00:12.520000
319	00:00:12.559000
320	00:00:12.599000
321	00:00:12.638000
322	00:00:12.678000
323	00:00:12.717000
324	00:00:12.757000
325	00:00:12.796000
326	00:00:12.836000
327	00:00:12.875000
328	00:00:12.915000
329	00:00:12.954000
330	00:00:12.994000
331	00:00:13.033000
332	00:00:13.073000
333	00:00:13.112000
334	00:00:13.152000
335	00:00:13.192000
336	00:00:13.231000
337	00:00:13.271000
338	00:00:13.310000
339	00:00:13.350000
340	00:00:13.389000
341	00:00:13.429000
342	00:00:13.468000
343	00:00:13.508000
344	00:00:13.547000
345	00:00:13.587000
346	00:00:13.626000
347	00:00:13.666000
348	00:00:13.705000
349	00:00:13.745000
350	00:00:13.784000
351	00:00:13.824000
352	00:00:13.863000
353	00:00:13.903000
354	00:00:13.942000
355	00:00:13.982000
356	00:00:14.021000
357	00:00:14.061000
358	00:00:14.100000
359	00:00:14.140000
360	00:00:14.179000
361	00:00:14.219000
362	00:00:14.258000
363	00:00:14.298000
364	00:00:14.337000
365	00:00:14.377000
366	00:00:14.416000
367	00:00:14.456000
368	00:00:14.495000
369	00:00:14.535000
370	00:00:14.574000
371	00:00:14.614000
372	00:00:14.654000
373	00:00:14.693000
374	00:00:14.733000
375	00:00:14.772000
376	00:00:14.812000
377	00:00:14.851000
378	00:00:14.891000
379	00:00:14.930000
380	00:00:14.970000
381	00:00:15.009000
382	00:00:15.049000
383	00:00:15.088000
384	00:00:15.128000
385	00:00:15.167000
386	00:00:15.207000
387	00:00:15.246000
388	00:00:15.286000
389	00:00:15.325000
390	00:00:15.365000
391	00:00:15.405000
392	00:00:15.445000
393	00:00:15.484000
394	00:00:15.524000
395	00:00:15.563000
396	00:00:15.603000
397	00:00:15.642000
398	00:00:15.682000
399	00:00:15.721000
400	00:00:15.761000
401	00:00:15.800000
402	00:00:15.840000
403	00:00:15.879000
404	00:00:15.919000
405	00:00:15.958000
406	00:00:15.998000
407	00:00:16.037000
408	00:00:16.077000
409	00:00:16.116000
410	00:00:16.156000
411	00:00:16.195000
412	00:00:16.235000
413	00:00:16.275000
414	00:00:16.314000
415	00:00:16.353000
416	00:00:16.393000
417	00:00:16.432000
418	00:00:16.472000
419	00:00:16.512000
420	00:00:16.551000
421	00:00:16.591000
422	00:00:16.630000
423	00:00:16.670000
424	00:00:16.709000
425	00:00:16.749000
426	00:00:16.788000
427	00:00:16.828000
428	00:00:16.867000
429	00:00:16.907000
430	00:00:16.946000
431	00:00:16.986000
432	00:00:17.025000
433	00:00:17.065000
434	00:00:17.104000
435	00:00:17.144000
436	00:00:17.183000
437	00:00:17.223000
438	00:00:17.262000
439	00:00:17.302000
440	00:00:17.341000
441	00:00:17.381000
442	00:00:17.420000
443	00:00:17.460000
444	00:00:17.499000
445	00:00:17.539000
446	00:00:17.578000
447	00:00:17.618000
448	00:00:17.657000
449	00:00:17.697000
450	00:00:17.736000
451	00:00:17.776000
452	00:00:17.815000
453	00:00:17.855000
454	00:00:17.894000
455	00:00:17.934000
456	00:00:17.974000
457	00:00:18.013000
458	00:00:18.053000
459	00:00:18.092000
460	00:00:18.132000
461	00:00:18.171000
462	00:00:18.211000
463	00:00:18.250000
464	00:00:18.290000
465	00:00:18.329000
466	00:00:18.369000
467	00:00:18.408000
468	00:00:18.448000
469	00:00:18.487000
470	00:00:18.527000
471	00:00:18.566000
472	00:00:18.606000
473	00:00:18.645000
474	00:00:18.685000
475	00:00:18.724000
476	00:00:18.764000
477	00:00:18.803000
478	00:00:18.843000
479	00:00:18.882000
480	00:00:18.922000
481	00:00:18.961000
482	00:00:19.001000
483	00:00:19.040000
484	00:00:19.080000
485	00:00:19.119000
486	00:00:19.159000
487	00:00:19.198000
488	00:00:19.238000
489	00:00:19.277000
490	00:00:19.317000
491	00:00:19.356000
492	00:00:19.396000
493	00:00:19.435000
494	00:00:19.475000
495	00:00:19.515000
496	00:00:19.554000
497	00:00:19.594000
498	00:00:19.633000
499	00:00:19.672000
500	00:00:19.712000
501	00:00:19.751000
502	00:00:19.791000
503	00:00:19.831000
504	00:00:19.870000
505	00:00:19.910000
506	00:00:19.949000
507	00:00:19.989000
508	00:00:20.028000
509	00:00:20.068000
510	00:00:20.107000
511	00:00:20.147000
512	00:00:20.186000
513	00:00:20.226000
514	00:00:20.265000
515	00:00:20.305000
516	00:00:20.344000
517	00:00:20.384000
518	00:00:20.423000
519	00:00:20.463000
520	00:00:20.502000
521	00:00:20.542000
522	00:00:20.581000
523	00:00:20.621000
524	00:00:20.660000
525	00:00:20.700000
526	00:00:20.739000
527	00:00:20.779000
528	00:00:20.818000
529	00:00:20.858000
530	00:00:20.897000
531	00:00:20.937000
532	00:00:20.976000
533	00:00:21.016000
534	00:00:21.055000
535	00:00:21.095000
536	00:00:21.134000
537	00:00:21.174000
538	00:00:21.213000
539	00:00:21.253000
540	00:00:21.293000
541	00:00:21.332000
542	00:00:21.372000
543	00:00:21.411000
544	00:00:21.451000
545	00:00:21.490000
546	00:00:21.530000
547	00:00:21.569000
548	00:00:21.609000
549	00:00:21.648000
550	00:00:21.688000
551	00:00:21.727000
552	00:00:21.767000
553	00:00:21.806000
554	00:00:21.846000
555	00:00:21.885000
556	00:00:21.925000
557	00:00:21.964000
558	00:00:22.004000
559	00:00:22.043000
560	00:00:22.083000
561	00:00:22.122000
562	00:00:22.162000
563	00:00:22.201000
564	00:00:22.241000
565	00:00:22.280000
566	00:00:22.320000
567	00:00:22.359000
568	00:00:22.399000
569	00:00:22.438000
570	00:00:22.478000
571	00:00:22.517000
572	00:00:22.557000
573	00:00:22.596000
574	00:00:22.636000
575	00:00:22.675000
576	00:00:22.715000
577	00:00:22.754000
578	00:00:22.794000
579	00:00:22.834000
580	00:00:22.873000
581	00:00:22.913000
582	00:00:22.952000
583	00:00:22.992000
584	00:00:23.031000
585	00:00:23.071000
586	00:00:23.110000
587	00:00:23.150000
588	00:00:23.189000
589	00:00:23.229000
590	00:00:23.268000
591	00:00:23.308000
592	00:00:23.347000
593	00:00:23.387000
594	00:00:23.426000
595	00:00:23.466000
596	00:00:23.505000
597	00:00:23.545000
598	00:00:23.584000
599	00:00:23.624000
600	00:00:23.663000
601	00:00:23.703000
602	00:00:23.742000
603	00:00:23.782000
604	00:00:23.821000
605	00:00:23.861000
606	00:00:23.900000
607	00:00:23.940000
608	00:00:23.979000
609	00:00:24.019000
610	00:00:24.058000
611	00:00:24.098000
612	00:00:24.137000
613	00:00:24.177000
614	00:00:24.216000
615	00:00:24.256000
616	00:00:24.296000
617	00:00:24.335000
618	00:00:24.375000
619	00:00:24.414000
620	00:00:24.454000
621	00:00:24.493000
622	00:00:24.532000
623	00:00:24.572000
624	00:00:24.612000
625	00:00:24.651000
626	00:00:24.691000
627	00:00:24.730000
628	00:00:24.770000
629	00:00:24.809000
630	00:00:24.849000
631	00:00:24.888000
632	00:00:24.928000
633	00:00:24.967000
634	00:00:25.007000
635	00:00:25.046000
636	00:00:25.086000
637	00:00:25.125000
638	00:00:25.165000
639	00:00:25.204000
640	00:00:25.244000
641	00:00:25.283000
642	00:00:25.323000
643	00:00:25.362000
644	00:00:25.403000
645	00:00:25.442000
646	00:00:25.482000
647	00:00:25.521000
648	00:00:25.561000
649	00:00:25.600000
650	00:00:25.640000
651	00:00:25.679000
652	00:00:25.719000
653	00:00:25.758000
654	00:00:25.798000
655	00:00:25.837000
656	00:00:25.877000
657	00:00:25.916000
658	00:00:25.956000
659	00:00:25.995000
660	00:00:26.035000
661	00:00:26.074000
662	00:00:26.114000
663	00:00:26.154000
664	00:00:26.193000
665	00:00:26.233000
666	00:00:26.272000
667	00:00:26.312000
668	00:00:26.351000
669	00:00:26.391000
670	00:00:26.430000
671	00:00:26.470000
672	00:00:26.509000
673	00:00:26.549000
674	00:00:26.588000
675	00:00:26.628000
676	00:00:26.667000
677	00:00:26.707000
678	00:00:26.746000
679	00:00:26.786000
680	00:00:26.825000
681	00:00:26.865000
682	00:00:26.904000
683	00:00:26.944000
684	00:00:26.983000
685	00:00:27.023000
686	00:00:27.062000
687	00:00:27.102000
688	00:00:27.141000
689	00:00:27.181000
690	00:00:27.220000
691	00:00:27.260000
692	00:00:27.299000
693	00:00:27.339000
694	00:00:27.378000
695	00:00:27.418000
696	00:00:27.457000
697	00:00:27.497000
698	00:00:27.536000
699	00:00:27.576000
700	00:00:27.616000
701	00:00:27.655000
702	00:00:27.695000
703	00:00:27.734000
704	00:00:27.774000
705	00:00:27.813000
706	00:00:27.853000
707	00:00:27.892000
708	00:00:27.932000
709	00:00:27.971000
710	00:00:28.011000
711	00:00:28.050000
712	00:00:28.090000
713	00:00:28.129000
714	00:00:28.169000
715	00:00:28.208000
716	00:00:28.248000
717	00:00:28.287000
718	00:00:28.327000
719	00:00:28.366000
720	00:00:28.406000
721	00:00:28.445000
722	00:00:28.485000
723	00:00:28.524000
724	00:00:28.564000
725	00:00:28.603000
726	00:00:28.643000
727	00:00:28.682000
728	00:00:28.722000
729	00:00:28.761000
730	00:00:28.801000
731	00:00:28.840000
732	00:00:28.880000
733	00:00:28.919000
734	00:00:28.959000
735	00:00:28.998000
736	00:00:29.038000
737	00:00:29.077000
738	00:00:29.117000
739	00:00:29.157000
740	00:00:29.196000
741	00:00:29.236000
742	00:00:29.275000
743	00:00:29.314000
744	00:00:29.354000
745	00:00:29.393000
746	00:00:29.433000
747	00:00:29.473000
748	00:00:29.512000
749	00:00:29.552000
750	00:00:29.591000
751	00:00:29.631000
752	00:00:29.670000
753	00:00:29.710000
754	00:00:29.749000
755	00:00:29.789000
756	00:00:29.828000
757	00:00:29.868000
758	00:00:29.907000
759	00:00:29.947000
760	00:00:29.986000
761	00:00:30.026000
762	00:00:30.065000
763	00:00:30.105000
764	00:00:30.144000
765	00:00:30.184000
766	00:00:30.223000
767	00:00:30.263000
768	00:00:30.302000
769	00:00:30.342000
770	00:00:30.381000
771	00:00:30.421000
772	00:00:30.460000
773	00:00:30.500000
774	00:00:30.539000
775	00:00:30.579000
776	00:00:30.618000
777	00:00:30.658000
778	00:00:30.697000
779	00:00:30.737000
780	00:00:30.776000
781	00:00:30.816000
782	00:00:30.855000
783	00:00:30.895000
784	00:00:30.935000
785	00:00:30.974000
786	00:00:31.014000
787	00:00:31.053000
788	00:00:31.093000
789	00:00:31.132000
790	00:00:31.172000
791	00:00:31.211000
792	00:00:31.251000
793	00:00:31.290000
794	00:00:31.330000
795	00:00:31.369000
796	00:00:31.409000
797	00:00:31.448000
798	00:00:31.488000
799	00:00:31.527000
800	00:00:31.567000
801	00:00:31.606000
802	00:00:31.646000
803	00:00:31.685000
804	00:00:31.725000
805	00:00:31.764000
806	00:00:31.804000
807	00:00:31.843000
808	00:00:31.883000
809	00:00:31.922000
810	00:00:31.962000
811	00:00:32.001000
812	00:00:32.041000
813	00:00:32.080000
814	00:00:32.120000
815	00:00:32.159000
816	00:00:32.199000
817	00:00:32.238000
818	00:00:32.278000
819	00:00:32.317000
820	00:00:32.357000
821	00:00:32.396000
822	00:00:32.436000
823	00:00:32.476000
824	00:00:32.515000
825	00:00:32.555000
826	00:00:32.594000
827	00:00:32.634000
828	00:00:32.673000
829	00:00:32.713000
830	00:00:32.752000
831	00:00:32.792000
832	00:00:32.831000
833	00:00:32.871000
834	00:00:32.910000
835	00:00:32.950000
836	00:00:32.989000
837	00:00:33.029000
838	00:00:33.068000
839	00:00:33.108000
840	00:00:33.147000
841	00:00:33.187000
842	00:00:33.226000
843	00:00:33.266000
844	00:00:33.305000
845	00:00:33.345000
846	00:00:33.384000
847	00:00:33.424000
848	00:00:33.463000
849	00:00:33.503000
850	00:00:33.542000
851	00:00:33.582000
852	00:00:33.621000
853	00:00:33.661000
854	00:00:33.700000
855	00:00:33.740000
856	00:00:33.779000
857	00:00:33.819000
858	00:00:33.858000
859	00:00:33.898000
860	00:00:33.938000
861	00:00:33.977000
862	00:00:34.017000
863	00:00:34.056000
864	00:00:34.096000
865	00:00:34.135000
866	00:00:34.174000
867	00:00:34.214000
868	00:00:34.254000
869	00:00:34.293000
870	00:00:34.333000
871	00:00:34.372000
872	00:00:34.412000
873	00:00:34.451000
874	00:00:34.491000
875	00:00:34.530000
876	00:00:34.570000
877	00:00:34.609000
878	00:00:34.649000
879	00:00:34.688000
880	00:00:34.728000
881	00:00:34.767000
882	00:00:34.807000
883	00:00:34.846000
884	00:00:34.886000
885	00:00:34.925000
886	00:00:34.965000
887	00:00:35.004000
888	00:00:35.044000
889	00:00:35.083000
890	00:00:35.123000
891	00:00:35.162000
892	00:00:35.202000
